# Supplementary material for: In Dormant Red Rice Seeds, the Inhibition of Early Seedling Growth, but Not of Germination, Requires Extracellular ABA
Source: MDPI journal article supplement (doi:10.3390/plants11081023), 2022-04-09
Supplement: s1 [file s1]

Supplementary Figure S1

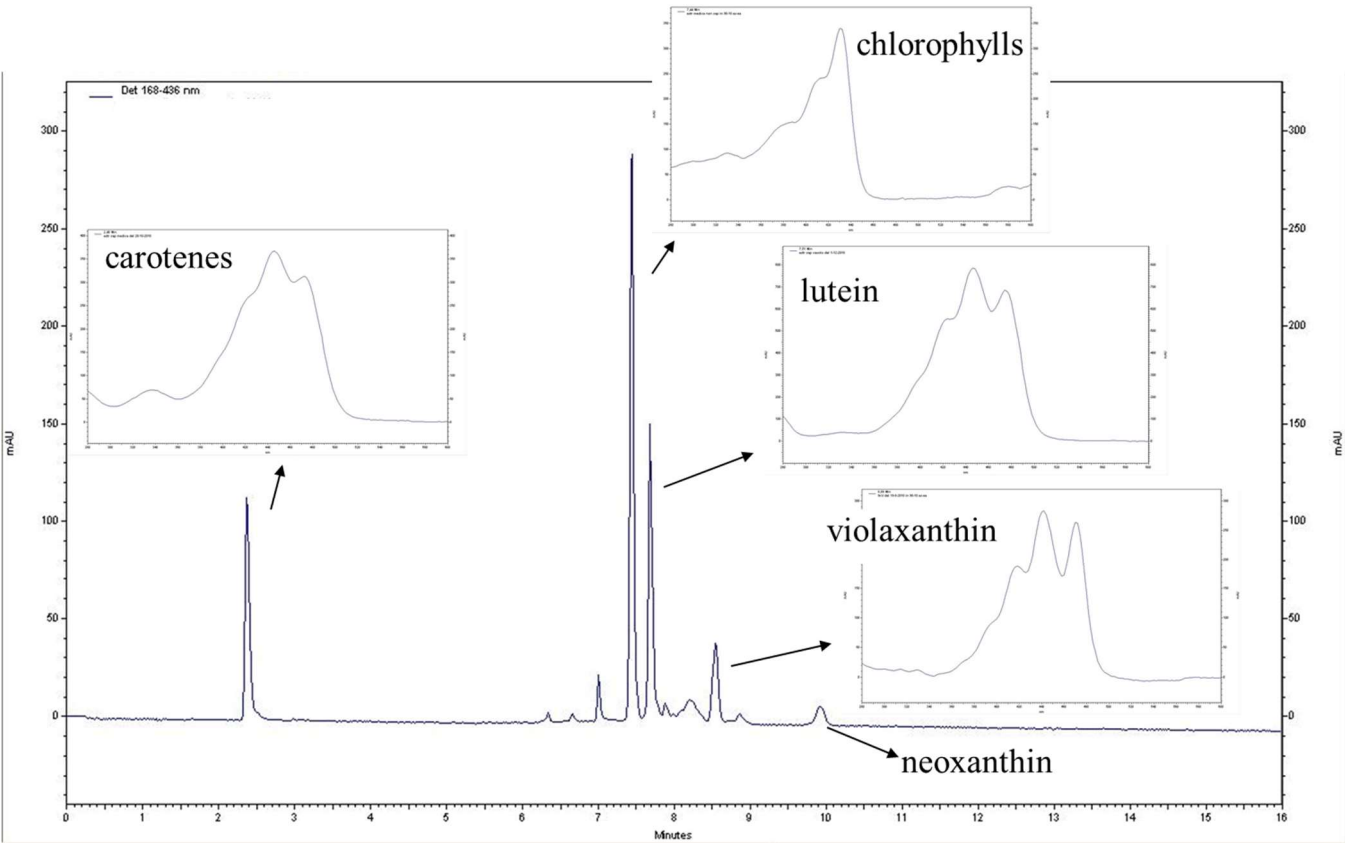

Supplementary Figure S1. HPLC analysis of the raw extract in 90:10 hexane/ethyl acetate.
