# Supplementary material for: In Dormant Red Rice Seeds, the Inhibition of Early Seedling Growth, but Not of Germination, Requires Extracellular ABA
Source: MDPI journal article supplement (doi:10.3390/plants11081023), 2022-04-09
Supplement: s1 [file s1]

Supplementary Figure S2

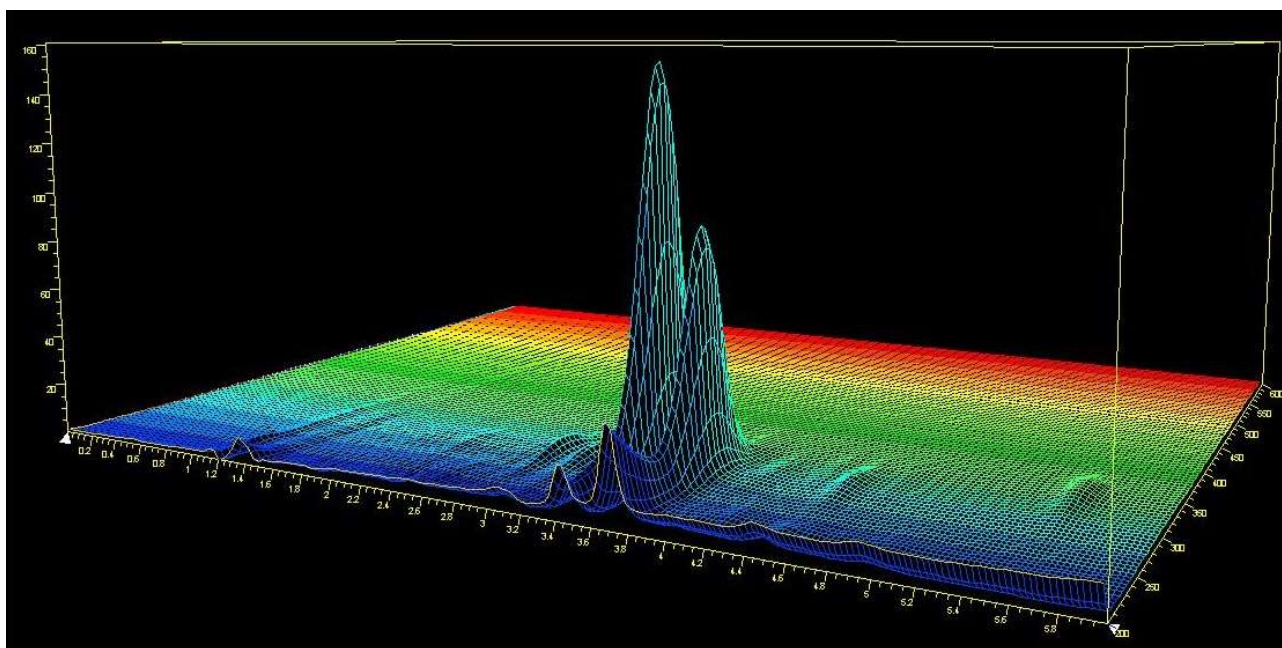

**Supplementary Figure S2.** 3D chromatogram of the isocratic reversed phase HPLC analysis with 40% acetonitrile containing 0.02% triethylamine) of the mixture of geometric isomers (in acetonitrile) obtained after irradiation with a Wood lamp.
